# Supplementary material for: Clinical Utility of Plasma Cell-Free DNA EGFR Mutation Analysis in Treatment-Naïve Stage IV Non-Small Cell Lung Cancer Patients
Source: MDPI journal article supplement (doi:10.3390/jcm11041144), 2022-02-21
Supplement: s1 [file s1]

**Supplementary Table S1.** Diagnostic performance of plasma and tissue EGFR mutation analysis (N = 311)

| Variables   | Plasma EGFR MUTATION Test |                    | Tissue EGFR Mutation Test |                    | <i>p</i> -Value |
|-------------|---------------------------|--------------------|---------------------------|--------------------|-----------------|
|             | n/N                       | % (95% CI)         | n/N                       | % (95% CI)         |                 |
| Sensitivity | 132/164                   | 80.5 (73.6–86.3)   | 130/164                   | 79.3 (72.3–85.2)   | 0.787           |
| Specificity | 147/147                   | 100.0 (97.5–100.0) | 147/147                   | 100.0 (97.5–100.0) | -               |
| Accuracy    | 279/311                   | 89.7 (85.8–92.9)   | 277/311                   | 89.1 (76.2–85.4)   | 0.808           |
| PPV         | 132/132                   | 100.0              | 130/130                   | 100.0              | -               |
| NPV         | 147/179                   | 82.1 (77.1–86.2)   | 147/181                   | 81.2 (76.2–85.4)   | 0.826           |

EGFR, epidermal growth factor receptor; CI, confidence interval; PPV, positive predictive value; NPV, negative predictive value.
